# Supplementary material
Source: MDPI journal article supplement (https://www.mdpi.com/2077-0472/11/6/533)
Supplement: s1 [file s1]

**Table S2.** Selected models for the  $\mathbf{G}_M$  matrix and number of estimated parameters ( $n_{par}$ ) considering each trait separately. The Akaike (AIC) and Bayesian (BIC) information criteria were used to compare the structures of the variance-covariance matrix. The models for the  $\mathbf{G}_M$  matrix were selected according to the lowest value of the BIC criterion for BRIX (in °Brix), sucrose content of the cane (POL%C, in %), sucrose content of the juice (POL%J, in %), fiber content (FIB, in %), stalk height (SH, in m), stalk number (SN), stalk diameter (SD, in mm), stalk weight of the plot (SW, in kg), cane yield (TCH, in t ha<sup>-1</sup>) and sucrose yield (TPH, in t ha<sup>-1</sup>) for BPSG over three harvest years (2014, 2015 and 2016). Bold numbers represent the smallest AIC and BIC values.

| Trait        | $\mathbf{G}_M$ matrix                    | Models        | $n_{par}$ | AIC             | BIC             |
|--------------|------------------------------------------|---------------|-----------|-----------------|-----------------|
| BRIX (°Brix) | $\mathbf{G}_M = \mathbf{G}_{M \times M}$ | (1) ID        | 1         | 9648.05         | 9683.41         |
|              |                                          | (2) DIAG      | 3         | 9647.57         | 9694.71         |
|              |                                          | (3) AR1       | 3         | 8808.15         | 8849.41         |
|              |                                          | (4) AR1 (Het) | 4         | <b>8782.15</b>  | <b>8835.19</b>  |
| POL%C        | $\mathbf{G}_M = \mathbf{G}_{M \times M}$ | (1) ID        | 1         | 11391.37        | 11426.73        |
|              |                                          | (2) DIAG      | 3         | 11395.26        | 11442.40        |
|              |                                          | (3) AR1       | 3         | <b>10565.16</b> | <b>10606.40</b> |
|              |                                          | (4) AR1 (Het) | 4         | 10568.19        | 10621.22        |
| POL%J        | $\mathbf{G}_M = \mathbf{G}_{M \times M}$ | (1) ID        | 1         | 11833.11        | 11868.47        |
|              |                                          | (2) DIAG      | 3         | 11836.86        | 11884.01        |
|              |                                          | (3) AR1       | 3         | <b>11011.37</b> | <b>11052.62</b> |
|              |                                          | (4) AR1 (Het) | 4         | 11013.35        | 11066.39        |
| FIB (%)      | $\mathbf{G}_M = \mathbf{G}_{M \times M}$ | (1) ID        | 1         | 12860.77        | 12896.10        |
|              |                                          | (2) DIAG      | 3         | 12830.96        | 12878.08        |
|              |                                          | (3) AR1       | 3         | 12352.04        | 12393.26        |
|              |                                          | (4) AR1 (Het) | 4         | <b>12184.22</b> | <b>12237.23</b> |
| SH (m)       | $\mathbf{G}_M = \mathbf{G}_{M \times M}$ | (1) ID        | 1         | 1321.71         | 1357.09         |
|              |                                          | (2) DIAG      | 3         | 1299.04         | 1346.22         |
|              |                                          | (3) AR1       | 3         | 789.67          | 830.95          |
|              |                                          | (4) AR1 (Het) | 4         | <b>727.05</b>   | <b>780.13</b>   |
| SN           | $\mathbf{G}_M = \mathbf{G}_{M \times M}$ | (1) ID        | 1         | 27714.26        | 27749.69        |
|              |                                          | (2) DIAG      | 3         | 27690.63        | 27737.88        |
|              |                                          | (3) AR1       | 3         | 27048.11        | 27089.45        |
|              |                                          | (4) AR1 (Het) | 4         | <b>26919.81</b> | <b>26972.97</b> |
| SD (mm)      | $\mathbf{G}_M = \mathbf{G}_{M \times M}$ | (1) ID        | 1         | 13341.12        | 13376.50        |
|              |                                          | (2) DIAG      | 3         | 13336.24        | 13383.41        |
|              |                                          | (3) AR1       | 3         | 12474.86        | 12516.14        |
|              |                                          | (4) AR1 (Het) | 4         | <b>12440.50</b> | <b>12493.57</b> |

|              |                                          |               |   |                 |                 |
|--------------|------------------------------------------|---------------|---|-----------------|-----------------|
| SW (Kg)      | $\mathbf{G}_M = \mathbf{G}_{M \times M}$ | (1) ID        | 1 | 27807.12        | 27842.51        |
|              |                                          | (2) DIAG      | 3 | 27667.89        | 27715.07        |
|              |                                          | (3) AR1       | 3 | 27400.02        | 27441.31        |
|              |                                          | (4) AR1 (Het) | 4 | <b>27156.38</b> | <b>27209.46</b> |
| TCH (t ha-1) | $\mathbf{G}_M = \mathbf{G}_{M \times M}$ | (1) ID        | 1 | 28745.20        | 28780.58        |
|              |                                          | (2) DIAG      | 3 | 28605.96        | 28653.15        |
|              |                                          | (3) AR1       | 3 | 28338.09        | 28379.38        |
|              |                                          | (4) AR1 (Het) | 4 | <b>28094.45</b> | <b>28147.54</b> |
| TPH (t ha-1) | $\mathbf{G}_M = \mathbf{G}_{M \times M}$ | (1) ID        | 1 | 18544.95        | 18580.26        |
|              |                                          | (2) DIAG      | 3 | 18361.52        | 18408.60        |
|              |                                          | (3) AR1       | 3 | 18131.39        | 18172.59        |
|              |                                          | (4) AR1 (Het) | 4 | <b>17784.57</b> | <b>17837.54</b> |

---

\* Do not converge.
