# Supplementary material
Source: MDPI journal article supplement (https://www.mdpi.com/2077-0472/11/6/533)
Supplement: s1 [file s1]

**Table S1.** Accessions names, ancestor germplasm or breeding germplasm (BP) and origin country of the 254 accessions of the Brazilian Panel of Sugarcane Genotypes (BPSG).

| Accession         | Female parent <sup>2</sup> | Male parent <sup>2</sup> | Origin <sup>2</sup> | Group <sup>3</sup> |
|-------------------|----------------------------|--------------------------|---------------------|--------------------|
| 28NG289           | <i>S. robustum</i>         | ?                        | NA                  | A                  |
| 57NG12            | <i>S. robustum</i>         | ?                        | NA                  | A                  |
| 75//09 ERIANTHUS  | <i>Erianthus</i> spp.      | ?                        | NA                  | A                  |
| AGAU              | <i>S. sinense</i>          | ?                        | South Africa        | A                  |
| AGOLE             | <i>S. barberi</i>          | ?                        | NA                  | A                  |
| AJA X             | <i>S. officinarum</i>      | ?                        | NA                  | A                  |
| AKBAR             | Co270                      | MQ27-1124                | NA                  | A                  |
| ARCHI             | <i>S. sinense</i>          | ?                        | Taiwan              | A                  |
| AROUNDOID B       | S. MUTANT                  | ?                        | United States       | A                  |
| BADILA            | <i>S. officinarum</i>      | NG9615                   | New Guinea          | A                  |
| BLACK BORNEO      | <i>S. officinarum</i>      | ?                        | Indonesia           | A                  |
| CAIANA FITA       | <i>S. officinarum</i>      | ?                        | NA                  | A                  |
| CAIANA LISTRADA   | <i>S. officinarum</i>      | ?                        | NA                  | A                  |
| CAIANA RISCADA    | <i>S. officinarum</i>      | ?                        | NA                  | A                  |
| CAIANA VERDADEIRA | <i>S. officinarum</i>      | ?                        | NA                  | A                  |
| CANA ALHO         | <i>S. officinarum</i>      | ?                        | NA                  | A                  |
| CANA BLANCA       | <i>S. officinarum</i>      | ?                        | NA                  | A                  |
| CANA MANTEIGA     | <i>S. officinarum</i>      | ?                        | NA                  | A                  |
| CB36-14           | Co213                      | ?                        | Brazil              | BB                 |
| CB36-24           | POJ2878                    | ?                        | Brazil              | BB                 |
| CB36-25           | POJ2878                    | ?                        | Brazil              | BB                 |
| CB36-68           | ?                          | ?                        | Brazil              | BB                 |
| CB40-13           | POJ2878                    | Co290                    | Brazil              | BB                 |
| CB40-77           | POJ2878                    | Co290                    | Brazil              | BB                 |
| CB41-76           | POJ2878                    | ?                        | Brazil              | BB                 |
| CB45-155          | Co413                      | ?                        | Brazil              | BB                 |
| CB45-3            | Co331                      | Co290                    | Brazil              | BB                 |
| CB46-47           | POJ2878                    | ?                        | Brazil              | BB                 |
| CB47-355          | POJ2878                    | Co413                    | Brazil              | BB                 |
| CB49-260          | CB44-36                    | ?                        | Brazil              | BB                 |
| CB53-98           | CB46-40                    | ?                        | Brazil              | BB                 |
| CERAM RED         | <i>S. officinarum</i>      | ?                        | NA                  | A                  |
| CHIN              | <i>S. barberi</i>          | ?                        | India               | A                  |
| CHINA             | <i>S. sinense</i>          | ?                        | NA                  | A                  |
| CHUNNE            | <i>S. barberi</i>          | ?                        | India               | A                  |
| CIMCA77-316       | CP66-346                   | CP70-321                 | Bolivia             | A                  |
| CIMCA77-318       | ?                          | ?                        | Bolivia             | A                  |
| Co290             | Co221                      | D74                      | India               | FH                 |
| Co331             | Co213                      | Co214                    | India               | FH                 |
| Co419             | POJ2878                    | Co290                    | India               | FH                 |
| Co449             | Co331                      | POJ2878                  | India               | FH                 |

**S1 Table.** Continued.

| Accession      | Female parent <sup>2</sup> | Male parent <sup>2</sup> | Origin <sup>2</sup> | Group <sup>3</sup> |
|----------------|----------------------------|--------------------------|---------------------|--------------------|
| Co740          | P3247                      | P4775                    | India               | FH                 |
| Co997          | Co683                      | P63-32                   | India               | FH                 |
| CP51-22        | F36-819                    | CP33-372                 | United States       | FH                 |
| CP52-68        | CP29-320                   | CP38-34                  | United States       | FH                 |
| CP53-76        | F36-819                    | CP36-46                  | United States       | FH                 |
| CP70-1547      | ?                          | ?                        | United States       | FH                 |
| CR72106        | EROS                       | B49-119                  | Dominican Republic  | FH                 |
| CRIOLLA MORADA | <i>S. officinarum</i>      | ?                        | NA                  | A                  |
| CRIOLLA RAYADA | <i>S. officinarum</i>      | ?                        | NA                  | A                  |
| CRISTALINA     | <i>S. officinarum</i>      | ?                        | NA                  | A                  |
| D11/35         | <i>S. officinarum</i>      | ?                        | United States       | A                  |
| D152           | B. cheribon                | Batjan                   | NA                  | A                  |
| D625           | Dyer                       | ?                        | NA                  | A                  |
| F150           | PT43-52                    | Nco-310                  | Taiwan              | FH                 |
| F31-962        | Co281                      | CP27-108                 | Taiwan              | FH                 |
| F36-819        | F31-962                    | POJ2878                  | Taiwan              | FH                 |
| F76-1762       | <i>Miscanthus</i> spp.     | <i>S. officinarum</i>    | NA                  | A                  |
| FORMOSA        | <i>S. officinarum</i>      | ?                        | Taiwan              | A                  |
| GANDACHENI     | <i>S. barberi</i>          | ?                        | India               | A                  |
| H. KAWANDANG   | <i>Erianthus</i> spp.      | ?                        | Indonesia           | A                  |
| H53-3989       | H48-3717                   | ?                        | United States       | FH                 |
| H59-1966       | H50-676                    | H49-3646                 | United States       | FH                 |
| HJ5741         | H40-1184                   | ?                        | United States       | A                  |
| IAC48-65       | CP27-108                   | ?                        | Brazil              | BB                 |
| IAC49-131      | CP27-108                   | ?                        | Brazil              | BB                 |
| IAC50-134      | Co419                      | Co285                    | Brazil              | BB                 |
| IAC51-205      | POJ2878                    | ?                        | Brazil              | BB                 |
| IAC52-150      | Co419                      | Co285                    | Brazil              | BB                 |
| IAC58-480      | POJ2878                    | CP44-101                 | Brazil              | BB                 |
| IAC64-257      | Co419                      | IAC49-131                | Brazil              | BB                 |
| IAC68-12       | Co419                      | IAC52-179                | Brazil              | BB                 |
| IAC82-2045     | IAC65-113                  | IAC52-150                | Brazil              | BB                 |
| IAC82-3092     | CB41-76                    | IAC68-12                 | Brazil              | BB                 |
| IAC83-4157     | IAC68-12                   | SP70-1143                | Brazil              | BB                 |
| IAC86-2210     | CP52-58                    | Co798                    | Brazil              | BB                 |
| IAC87-3396     | Co740                      | SP70-1143                | Brazil              | BB                 |
| IS76-155       | <i>S. officinarum</i>      | ?                        | NA                  | A                  |
| IJ76-360       | <i>S. edule</i>            | ?                        | NA                  | A                  |
| IJ76-293       | <i>S. robustum</i>         | ?                        | Indonesia           | A                  |
| IJ76-313       | <i>S. officinarum</i>      | ?                        | Indonesia           | A                  |
| IJ76-314       | <i>S. robustum</i>         | <i>S. officinarum</i>    | Indonesia           | A                  |
| IJ76-317       | <i>S. officinarum</i>      | ?                        | Indonesia           | A                  |

**S1 Table.** Continued.

| Accession    | Female parent <sup>2</sup> | Male parent <sup>2</sup> | Origin <sup>2</sup> | Group <sup>3</sup> |
|--------------|----------------------------|--------------------------|---------------------|--------------------|
| IJ76-318     | <i>S. robustum</i>         | ?                        | Indonesia           | A                  |
| IJ76-325     | <i>S. officinarum</i>      | ?                        | Indonesia           | A                  |
| IJ76-326     | <i>S. officinarum</i>      | ?                        | Indonesia           | A                  |
| IJ76-418 RED | <i>S. officinarum</i>      | ?                        | Indonesia           | A                  |
| IM76-227     | <i>Erianthus</i> spp.      | ?                        | Indonesia           | A                  |
| IM76-228     | <i>S. robustum</i>         | ?                        | Indonesia           | A                  |
| IM76-229     | <i>S. robustum</i>         | ?                        | Indonesia           | A                  |
| IN84-103     | <i>S. officinarum</i>      | ?                        | Indonesia           | A                  |
| IN84-104     | <i>S. robustum</i>         | ?                        | Indonesia           | A                  |
| IN84-105     | <i>S. officinarum</i>      | ?                        | Indonesia           | A                  |
| IN84-106     | <i>S. officinarum</i>      | ?                        | Indonesia           | A                  |
| IN84-117     | <i>S. robustum</i>         | ?                        | Indonesia           | A                  |
| IN84-46      | <i>S. officinarum</i>      | ?                        | Indonesia           | A                  |
| IN84-58      | <i>S. spontaneum</i>       | ?                        | Indonesia           | A                  |
| IN84-73      | <i>Erianthus</i> spp.      | ?                        | NA                  | A                  |
| IN84-77      | <i>Erianthus</i> spp.      | ?                        | NA                  | A                  |
| IN84-82      | <i>S. spontaneum</i>       | ?                        | Indonesia           | A                  |
| IN84-83      | <i>Erianthus</i> spp.      | ?                        | NA                  | A                  |
| IN84-88      | <i>S. spontaneum</i>       | ?                        | Indonesia           | A                  |
| KRAKATAU     | <i>S. spontaneum</i>       | ?                        | NA                  | A                  |
| L60-14       | CP52-1                     | CP48-103                 | United States       | FH                 |
| LAUKONA      | <i>S. officinarum</i>      | ?                        | United States       | A                  |
| LOUSER       | <i>S. officinarum</i>      | ?                        | NA                  | A                  |
| MALI         | 405N1133                   | 33MQ371                  | NA                  | FH                 |
| MANAII       | <i>S. officinarum</i>      | ?                        | NA                  | A                  |
| MANERIA      | <i>S. sinense</i>          | ?                        | India               | A                  |
| MUNTOK JAVA  | <i>S. officinarum</i>      | ?                        | Indonesia           | A                  |
| MZ-151       | <i>S. officinarum</i>      | ?                        | NA                  | A                  |
| NA56-79      | Co419                      | Co419                    | Argentina           | FH                 |
| Nco-310      | Co421                      | Co312                    | South Africa        | FH                 |
| NG21-17      | <i>S. officinarum</i>      | ?                        | New Guinea          | A                  |
| NG21-21      | <i>S. officinarum</i>      | ?                        | New Guinea          | A                  |
| NG57-50      | <i>S. officinarum</i>      | <i>S. spontaneum</i>     | New Guinea          | A                  |
| NG57-221     | <i>S. officinarum</i>      | ?                        | New Guinea          | A                  |
| NG77-18      | <i>S. officinarum</i>      | ?                        | New Guinea          | A                  |
| POJ161       | Black Cheribon             | Chunnee                  | Indonesia           | A                  |
| POJ2878      | POJ2364                    | EK28                     | Indonesia           | FH                 |
| Q117         | 58N829                     | Q77                      | Australia           | FH                 |
| Q165         | Q 117                      | CP 33/372                | Australia           | FH                 |
| Q70          | POJ2878                    | H31-2484                 | Australia           | FH                 |
| R570         | R445                       | H32-8560                 | Reunion Island      | FH                 |

**S1 Table.** Continued.

| Accession | Female parent <sup>2</sup> | Male parent <sup>2</sup> | Origin <sup>2</sup> | Group <sup>3</sup> |
|-----------|----------------------------|--------------------------|---------------------|--------------------|
| RB002601  | RB75126                    | Q107                     | Brazil              | BB                 |
| RB002700  | SP80-1816                  | ?                        | Brazil              | BB                 |
| RB002754  | RB835205                   | ?                        | Brazil              | BB                 |
| RB721012  | Co331                      | ?                        | Brazil              | BB                 |
| RB72199   | NCo334                     | ?                        | Brazil              | BB                 |
| RB72454   | CP53-76                    | ?                        | Brazil              | BB                 |
| RB725053  | Co775                      | ?                        | Brazil              | BB                 |
| RB725828  | NA56-79                    | ?                        | Brazil              | BB                 |
| RB732577  | Nco-376                    | ?                        | Brazil              | BB                 |
| RB735200  | Co331                      | ?                        | Brazil              | BB                 |
| RB735220  | CB61-99                    | ?                        | Brazil              | BB                 |
| RB735275  | IAC49-131                  | ?                        | Brazil              | BB                 |
| RB736018  | M253/48                    | ?                        | Brazil              | BB                 |
| RB739735  | CB52-179                   | ?                        | Brazil              | BB                 |
| RB75126   | C278                       | ?                        | Brazil              | BB                 |
| RB765418  | M253/48                    | ?                        | Brazil              | BB                 |
| RB785148  | IAC47-31                   | ?                        | Brazil              | BB                 |
| RB785750  | TUC67-11                   | ?                        | Brazil              | BB                 |
| RB806043  | NA56-79                    | ?                        | Brazil              | BB                 |
| RB815521  | NA56-79                    | ?                        | Brazil              | BB                 |
| RB815627  | IAC49-131                  | NA56-79                  | Brazil              | BB                 |
| RB815690  | IAC49-131                  | NA56-79                  | Brazil              | BB                 |
| RB825317  | L60-14                     | CB47-355                 | Brazil              | BB                 |
| RB825336  | H53-3989                   | ?                        | Brazil              | BB                 |
| RB825548  | F150                       | ?                        | Brazil              | BB                 |
| RB83100   | NA56-79                    | SP70-1143                | Brazil              | BB                 |
| RB83102   | NA56-79                    | SP70-1143                | Brazil              | BB                 |
| RB83160   | NA56-79                    | SP70-1143                | Brazil              | BB                 |
| RB835019  | RB72454                    | NA56-79                  | Brazil              | BB                 |
| RB835054  | RB72454                    | NA56-79                  | Brazil              | BB                 |
| RB835089  | RB72454                    | NA56-79                  | Brazil              | BB                 |
| RB835205  | Co740                      | ?                        | Brazil              | BB                 |
| RB835486  | L60-14                     | ?                        | Brazil              | BB                 |
| RB835687  | RB72454                    | NA56-79                  | Brazil              | BB                 |
| RB845197  | RB72454                    | SP70-1143                | Brazil              | BB                 |
| RB845210  | RB72454                    | SP70-1143                | Brazil              | BB                 |
| RB845239  | RB72454                    | SP70-1143                | Brazil              | BB                 |
| RB845257  | RB72454                    | SP70-1143                | Brazil              | BB                 |
| RB845286  | RB72454                    | SP70-1143                | Brazil              | BB                 |
| RB855002  | SP70-1143                  | RB72454                  | Brazil              | BB                 |
| RB855035  | L60-14                     | SP70-1284                | Brazil              | BB                 |
| RB855036  | RB72454                    | SP70-1143                | Brazil              | BB                 |

**S1 Table.** Continued.

| Accession      | Female parent <sup>2</sup> | Male parent <sup>2</sup> | Origin <sup>2</sup> | Group <sup>3</sup> |
|----------------|----------------------------|--------------------------|---------------------|--------------------|
| RB855063       | TUC71-7                    | SP70-1143                | Brazil              | BB                 |
| RB855070       | SP70-1143                  | TUC71-7                  | Brazil              | BB                 |
| RB855077       | SP70-1143                  | TUC71-7                  | Brazil              | BB                 |
| RB855113       | SP70-1143                  | RB72454                  | Brazil              | BB                 |
| RB855156       | RB72454                    | TUC71-7                  | Brazil              | BB                 |
| RB855196       | RB72454                    | TUC71-7                  | Brazil              | BB                 |
| RB855206       | RB72454                    | TUC71-7                  | Brazil              | BB                 |
| RB855350       | RB72454                    | ?                        | Brazil              | BB                 |
| RB855357       | RB72454                    | ?                        | Brazil              | BB                 |
| RB855453       | TUC71-7                    | ?                        | Brazil              | BB                 |
| RB855463       | RB72454                    | ?                        | Brazil              | BB                 |
| RB855465       | RB72454                    | ?                        | Brazil              | BB                 |
| RB855511       | SP71-1406                  | ?                        | Brazil              | BB                 |
| RB855533       | NA56-79                    | ?                        | Brazil              | BB                 |
| RB855536       | SP70-1143                  | RB72454                  | Brazil              | BB                 |
| RB855546       | SP70-1143                  | RB72454                  | Brazil              | BB                 |
| RB855563       | TUC71-7                    | SP70-1143                | Brazil              | BB                 |
| RB855574       | SP70-1143                  | TUC71-7                  | Brazil              | BB                 |
| RB855589       | SP70-1143                  | TUC71-7                  | Brazil              | BB                 |
| RB855595       | SP70-1143                  | TUC71-7                  | Brazil              | BB                 |
| RB855598       | SP70-1143                  | TUC71-7                  | Brazil              | BB                 |
| RB865214       | RB735220                   | SP71-6163                | Brazil              | BB                 |
| RB867515       | RB72454                    | ?                        | Brazil              | BB                 |
| RB925211       | RB855206                   | ?                        | Brazil              | BB                 |
| RB925268       | RB855511                   | ?                        | Brazil              | BB                 |
| RB925345       | H59-1966                   | ?                        | Brazil              | BB                 |
| RB92579        | RB75126                    | RB72199                  | Brazil              | BB                 |
| RB935744       | RB835089                   | RB765418                 | Brazil              | BB                 |
| RB965902       | RB855536                   | RB855453                 | Brazil              | BB                 |
| RB965917       | RB855453                   | RB855536                 | Brazil              | BB                 |
| RB966928       | RB855156                   | RB815690                 | Brazil              | BB                 |
| RB975148       | RB815521                   | RB835486                 | Brazil              | BB                 |
| SABURA         | <i>S. officinarum</i>      | ?                        | NA                  | A                  |
| SAC OFFIC 8272 | <i>S. officinarum</i>      | ?                        | Malasia             | A                  |
| SAC OFFIC 8276 | <i>S. officinarum</i>      | ?                        | Malasia             | A                  |
| SAC OFFIC 8280 | <i>S. officinarum</i>      | ?                        | Malasia             | A                  |
| SAC OFFIC 8284 | <i>S. officinarum</i>      | ?                        | Malasia             | A                  |
| SES205A        | <i>S. spontaneum</i>       | ?                        | India               | A                  |

**S1 Table.** Continued.

| Accession         | Female parent <sup>2</sup> | Male parent <sup>2</sup> | Origin <sup>2</sup> | Group <sup>3</sup> |
|-------------------|----------------------------|--------------------------|---------------------|--------------------|
| SP70-1005         | IAC48-65                   | ?                        | Brazil              | BB                 |
| SP70-1078         | IAC48-65                   | ?                        | Brazil              | BB                 |
| SP70-1143         | IAC48-65                   | ?                        | Brazil              | BB                 |
| SP70-1284         | CB41-76                    | ?                        | Brazil              | BB                 |
| SP70-1423         | CB41-76                    | ?                        | Brazil              | BB                 |
| SP70-3370         | CP53-17                    | ?                        | Brazil              | BB                 |
| SP71-1406         | NA56-79                    | ?                        | Brazil              | BB                 |
| SP71-6949         | NA56-79                    | ?                        | Brazil              | BB                 |
| SP71-799          | NA56-79                    | ?                        | Brazil              | BB                 |
| SP72-4928         | CP52-48                    | ?                        | Brazil              | BB                 |
| SP77-5181         | HJ57-41                    | ?                        | Brazil              | BB                 |
| SP79-1011         | NA56-79                    | Co775                    | Brazil              | BB                 |
| SP79-2233         | H56-2954                   | ?                        | Brazil              | BB                 |
| SP79-2312         | SP71-6106                  | ?                        | Brazil              | BB                 |
| SP79-2313         | SP71-6106                  | ?                        | Brazil              | BB                 |
| SP79-6192         | SP70-3518                  | ?                        | Brazil              | BB                 |
| SP80-1520         | H48-3166                   | SP71-1088                | Brazil              | BB                 |
| SP80-1816         | SP71-1088                  | H57-5028                 | Brazil              | BB                 |
| SP80-1836         | SP71-1088                  | H57-5028                 | Brazil              | BB                 |
| SP80-1842         | SP71-1088                  | H57-5028                 | Brazil              | BB                 |
| SP80-185          | BO17                       | ?                        | Brazil              | BB                 |
| SP80-3280         | SP71-1088                  | H57-5028                 | Brazil              | BB                 |
| SP81-1763         | co775                      | NA56-79                  | Brazil              | BB                 |
| SP81-3250         | CP70-1547                  | SP71-1279                | Brazil              | BB                 |
| SP83-2847         | HJ5741                     | SP70-1143                | Brazil              | BB                 |
| SP83-5073         | SP71-1406                  | SP71-1088                | Brazil              | BB                 |
| SP86-155          | SP78-3081                  | ?                        | Brazil              | BB                 |
| SP89-1115         | CP73-1547                  | ?                        | Brazil              | BB                 |
| SP91-1049         | SP80-3328                  | SP81-3250                | Brazil              | BB                 |
| TUC71-7           | CP52-68                    | CP62-258                 | Argentina           | FH                 |
| UBA DEMERARA      | <i>S. sinense</i>          | ?                        | NA                  | A                  |
| US57-141-5        | <i>S. robustum</i>         | ?                        | NA                  | A                  |
| US60-31-3         | 28NG12                     | US57-159                 | United States       | FH                 |
| US85-1008         | <i>S. spontaneum</i>       | US60-31-3                | NA                  | A                  |
| WHITE MAURITIUS   | <i>S. officinarum</i>      | ?                        | India               | A                  |
| WHITE PARARIA     | <i>S. barberi</i>          | ?                        | India               | A                  |
| WHITE TRANSPARENT | <i>S. officinarum</i>      | ?                        | India               | A                  |
| ZWART MANILA      | <i>S. officinarum</i>      | ?                        | Indonesia           | A                  |

<sup>1</sup>Accessions number in STRUCTURE analysis (Material and Methods section 2.3). <sup>2</sup>Information from RIDESA germoplasm bank (<http://www.ridesaufscar.com.br>), Miami World Collection (<http://npgsweb.arsgrin.gov/gringlobal/search.aspx>) and Sugarcane Variety Notes (Rossi, 2000). NA: not available information. <sup>3</sup>Predefined groups: ancestors accessions (A); accessions of *Saccharum* spp. hybrids from Brazilian breeding programs (BB); accessions of *Saccharum* spp. hybrids from foreign breeding programs - foreign hybrids (FH).
